# Supplementary material for: Correlation between Sperm Micro Ribonucleic Acid-34b and -34c Levels and Clinical Outcomes of Intracytoplasmic Sperm Injection in Men with Male Factor Infertility
Source: MDPI journal article supplement (doi:10.3390/ijms232012381), 2022-10-16
Supplement: s1 [file s1]

## Supplemental Materials

**Table S1.** Comparison of sperm miR-34b levels and ICSI outcomes in male factor samples.

| ICSI outcomes                            | miR-34b(-) <sup>1</sup> | miR-34b(+) <sup>2</sup> | p-Value |
|------------------------------------------|-------------------------|-------------------------|---------|
| Cycle (n = 57)                           | 20                      | 37                      |         |
| Normal fertilization rate (per MII, %)   | 73.60%                  | 81.49%                  | 0.0738  |
| More than 50% good-quality embryos (%)   | 10.00%                  | 21.62%                  | 0.4674  |
| Implantation rate (per embryo, %)        | 4.95%                   | 36.46%                  | 0.0011  |
| hCG+ rate (per embryo transfer, %)       | 30.00%                  | 56.00%                  | 0.0943  |
| Sac+ rate (per embryo transfer, %)       | 15.00%                  | 54.05%                  | 0.0049  |
| FHB+ rate (per embryo transfer, %)       | 15.00%                  | 48.65%                  | 0.0201  |
| Live birth rate (per embryo transfer, %) | 5.00%                   | 43.24%                  | 0.0024  |
| Miscarriages rate (%)                    | 50.00%                  | 14.00%                  | 0.1009  |

<sup>1</sup> miR-34b(-),  $\Delta Ct \leq 8.630$ ; <sup>2</sup> miR-34b(+),  $\Delta Ct > 8.630$

**Table S2.** Comparison of sperm miR-34c levels and ICSI outcomes in male factor samples.

| ICSI outcomes                            | miR-34c(-) <sup>1</sup> | miR-34c(+) <sup>2</sup> | p-Value |
|------------------------------------------|-------------------------|-------------------------|---------|
| Cycle (n = 57)                           | 38                      | 19                      |         |
| Normal fertilization rate (per MII, %)   | 78.47%                  | 79.21%                  | 0.8708  |
| More than 50% good-quality embryos (%)   | 18.42%                  | 15.79%                  | 0.9999  |
| Implantation rate (per embryo, %)        | 18.39%                  | 39.42%                  | 0.0360  |
| hCG+ rate (per embryo transfer, %)       | 36.84%                  | 68.42%                  | 0.0475  |
| sac+ rate (per embryo transfer, %)       | 28.95%                  | 63.16%                  | 0.0214  |
| FHB+ rate (per embryo transfer, %)       | 23.68%                  | 63.16%                  | 0.0077  |
| Live birth rate (per embryo transfer, %) | 15.79%                  | 57.89%                  | 0.0019  |
| Miscarriages rate (%)                    | 45.45%                  | 8.33%                   | 0.0686  |

<sup>1</sup> miR-34c(-),  $\Delta Ct \leq 7.883$ ; <sup>2</sup> miR-34c(+),  $\Delta Ct > 7.883$

**Table S3.** Comparison of sperm miR-34b levels and ICSI outcomes in all ICSI samples.

| ICSI outcomes                            | miR-34b(-) <sup>1</sup> | miR-34b(+) <sup>2</sup> | p-Value |
|------------------------------------------|-------------------------|-------------------------|---------|
| Cycle (n = 81)                           | 37                      | 44                      |         |
| Normal fertilization rate (per MII, %)   | 73.78%                  | 78.61%                  | 0.2037  |
| More than 50% good-quality embryos (%)   | 16.22%                  | 20.45%                  | 0.7759  |
| Implantation rate (per embryo, %)        | 22.27%                  | 32.93%                  | 0.2161  |
| hCG+ rate (per embryo transfer, %)       | 46.00%                  | 50.00%                  | 0.8242  |
| Sac+ rate (per embryo transfer, %)       | 32.43%                  | 47.73%                  | 0.1810  |
| FHB+ rate (per embryo transfer, %)       | 29.73%                  | 43.18%                  | 0.0323  |
| Live birth rate (per embryo transfer, %) | 21.62%                  | 38.64%                  | 0.1470  |
| Miscarriages rate (%)                    | 35.00%                  | 14.00%                  | 0.2431  |

<sup>1</sup> miR-34b(-),  $\Delta Ct \leq 8.630$ ; <sup>2</sup> miR-34b(+),  $\Delta Ct > 8.630$

**Table S4.** Comparison of sperm miR-34c levels and ICSI outcomes in all ICSI samples.

| ICSI outcomes                            | miR-34c(-) <sup>1</sup> | miR-34c(+) <sup>2</sup> | p-Value |
|------------------------------------------|-------------------------|-------------------------|---------|
| Cycle (n = 81)                           | 59                      | 22                      |         |
| Normal fertilization rate (per MII, %)   | 77.91%                  | 75.85%                  | 0.6296  |
| More than 50% good-quality embryos (%)   | 20.34%                  | 13.64%                  | 0.7486  |
| Implantation rate (per embryo, %)        | 24.14%                  | 38.59%                  | 0.1334  |
| hCG+ rate (per embryo transfer, %)       | 42.00%                  | 64.00%                  | 0.1331  |
| sac+ rate (per embryo transfer, %)       | 33.90%                  | 59.09%                  | 0.0466  |
| FHB+ rate (per embryo transfer, %)       | 28.81%                  | 59.09%                  | 0.0191  |
| Live birth rate (per embryo transfer, %) | 22.03%                  | 54.55%                  | 0.0072  |
| Miscarriages rate (%)                    | 35.00%                  | 8.00%                   | 0.1189  |

<sup>1</sup> miR-34c(-),  $\Delta\text{Ct} \leq 7.883$ ; <sup>2</sup> miR-34c(+),  $\Delta\text{Ct} > 7.883$

**Table S5.** Regression coefficients of models 1 and 2 for the teratozoospermia samples.

| Factors                            | OR      | 95% CI       | OR      | 95% CI       |
|------------------------------------|---------|--------------|---------|--------------|
|                                    | Model 1 |              | Model 2 |              |
| $\Delta\text{Ct}$ value of miR-34b | 2.235*  | 1.099-4.543  |         |              |
| $\Delta\text{Ct}$ value of miR-34c |         |              | 2.032 * | 1.149-3.593  |
| Numbers of oocytes received        | 0.871   | 0.741-1.023  | 0.847   | 0.715-1.004  |
| Numbers of good-quality embryos    | 0.707   | 0.406-1.233  | 0.694   | 0.397-1.213  |
| Numbers of implanted embryos       | 0.634   | 0.157-2.567  | 0.758   | 0.164-3.503  |
| Embryo transfer days               | 3.624*  | 1.256-10.452 | 3.867 * | 1.287-11.616 |
| Woman's age (y)                    | 0.923   | 0.665-1.282  | 0.913   | 0.645-1.294  |
| Infertile year                     | 1.286   | 0.882-1.874  | 1.212   | 0.822-1.787  |

\*  $p < 0.05$

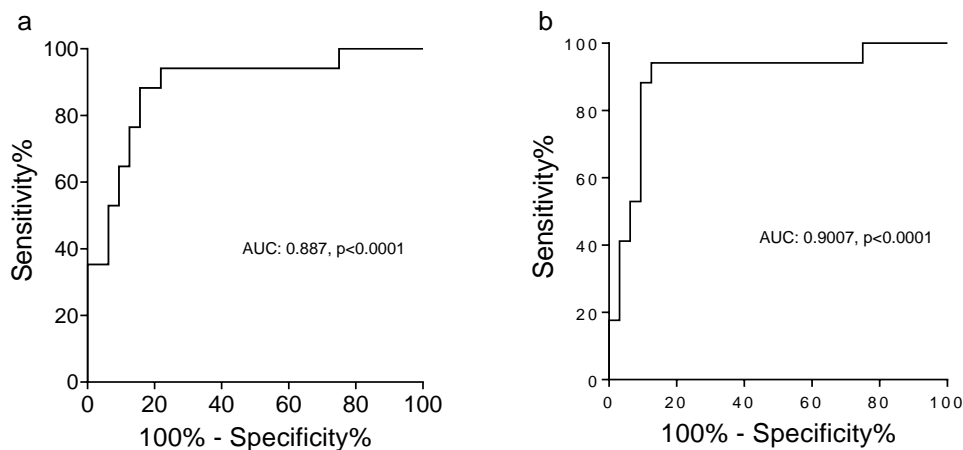**Figure S1.** ROC curve analysis of miR-34b/c. (a) miR-34b, model 1. (b) miR-34c, model 2.
